# Supplementary material
Source: PubMed Central journal article supplement (PMC6777125)
Supplement: ao9b02597_si_001.pdf [file ao9b02597_si_001.pdf]

Supporting Information for

**Structural Engineering of Graphitic Carbon Nitrides for Enhanced Metal-free  
PET-RAFT Polymerizations in Heterogeneous and Homogeneous Systems**

Lei Zhang<sup>a</sup>, Gang Ye<sup>a,b,\*</sup>, Xiaomei Huo<sup>a</sup>, Shengming Xu<sup>a,b</sup>, Jing Chen<sup>a,b</sup>, Krzysztof Matyjaszewski<sup>c,\*</sup>

<sup>a</sup> Collaborative Innovation Center of Advanced Nuclear Energy Technology, Institute of Nuclear and New Energy Technology, Tsinghua University, Beijing, 100084, China

<sup>b</sup> Beijing Key Lab of Radioactive Waste Treatment, Tsinghua University, Beijing 100084, China

<sup>c</sup> Department of Chemistry, Carnegie Mellon University, 4400 Fifth Avenue, Pittsburgh

Corresponding Authors, E-mail: yegang@mail.tsinghua.edu.cn; matyjaszewski@cmu.edu

## Supporting Figures

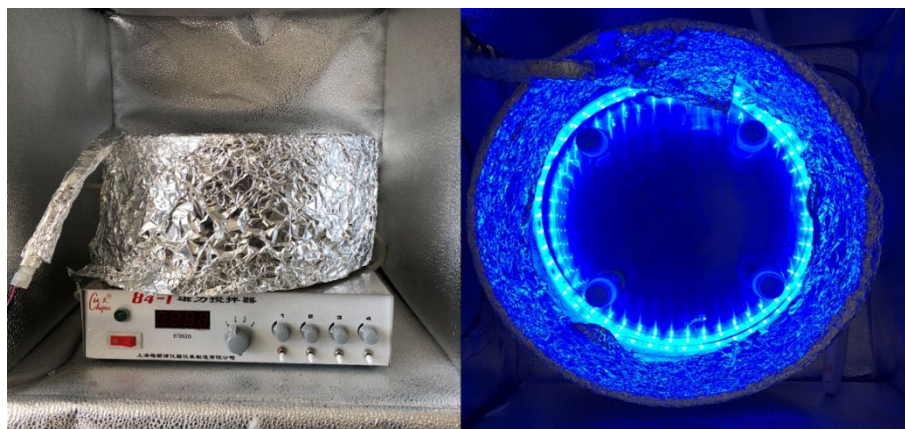

**Figure S1.** Photographs of the setup for PET-RAFT polymerization

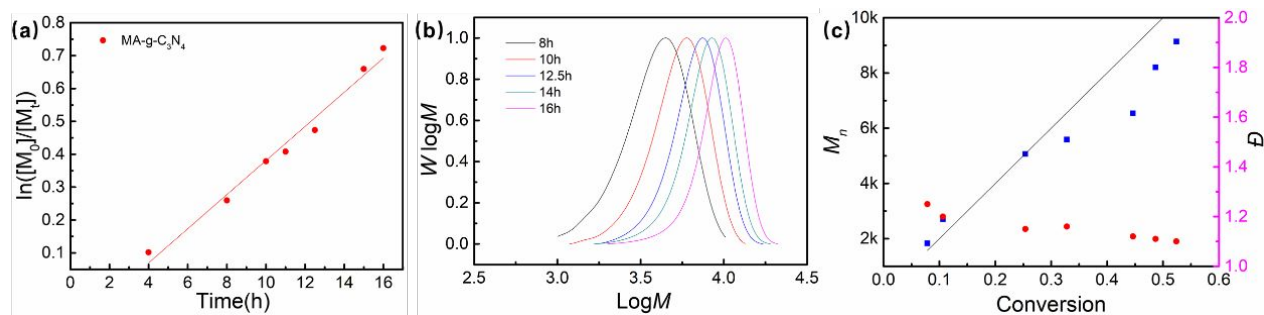

**Figure S2.** Kinetic study of MA-g-C<sub>3</sub>N<sub>4</sub> catalyzed PET-RAFT polymerization of MMA using CPADB as the chain transfer agent under blue LED irradiation ( $\lambda_{\text{max}}=465$  nm, 3 mW/cm<sup>2</sup>). The molar ratio of [MMA]/[CPADB]=200: 1 in 1 mL DMSO: (a)  $\ln([M]_0/[M]_t)$  versus irradiation time and the fitted kinetic curve; (b) GPC profiles of PMMA synthesized in the kinetic study; (c) Number average molecular weight ( $M_n$ ) and dispersity ( $D$ ) of PMMA obtained in the kinetic study.

## Supporting Tables

**Table S1.** Kinetic study on PET-RAFT polymerization of MMA catalyzed by TCA-g-C<sub>3</sub>N<sub>4</sub> under 3 mW/cm<sup>2</sup> blue LED irradiation.

| Entry | g-C <sub>3</sub> N <sub>4</sub> | [MMA]:[CPADB] | m <sub>g-C<sub>3</sub>N<sub>4</sub></sub> | Time (h) | $\alpha$ (%) | $M_{n,theo}$ | $M_{n,GPC}$ | $\bar{D}$ |
|-------|---------------------------------|---------------|-------------------------------------------|----------|--------------|--------------|-------------|-----------|
| 1     | TCA                             | 200:1         | 5                                         | 4        | 15           | 3,000        | 2,200       | 1.35      |
| 2     | TCA                             | 200:1         | 5                                         | 6        | 20           | 4,100        | 4,000       | 1.21      |
| 3     | TCA                             | 200:1         | 5                                         | 8        | 23           | 4,700        | 5,400       | 1.17      |
| 4     | TCA                             | 200:1         | 5                                         | 10       | 32           | 6,400        | 6,900       | 1.13      |
| 5     | TCA                             | 200:1         | 5                                         | 11       | 36           | 7,200        | 7,500       | 1.12      |
| 6     | TCA                             | 200:1         | 5                                         | 12.5     | 43           | 8,600        | 8,400       | 1.11      |
| 7     | TCA                             | 200:1         | 5                                         | 14       | 49           | 9,900        | 9,300       | 1.11      |
| 8     | TCA                             | 200:1         | 5                                         | 15       | 55           | 11,000       | 10,100      | 1.10      |
| 9     | TCA                             | 200:1         | 5                                         | 16       | 60           | 12,000       | 10,800      | 1.10      |

**Table S2.** Kinetic study on PET-RAFT polymerization of MMA catalyzed by MA-g-C<sub>3</sub>N<sub>4</sub> under 3 mW/cm<sup>2</sup> blue LED irradiation.

| Entry | g-C <sub>3</sub> N <sub>4</sub> | [MMA]:[CPADB] | m <sub>g-C<sub>3</sub>N<sub>4</sub></sub> | Time (h) | $\alpha$ (%) | $M_{n,theo}$ | $M_{n,GPC}$ | $\bar{D}$ |
|-------|---------------------------------|---------------|-------------------------------------------|----------|--------------|--------------|-------------|-----------|
| 1     | MA                              | 200:1         | 5                                         | 6        | 12           | 2,400        | 2,700       | 1.20      |
| 2     | MA                              | 200:1         | 5                                         | 8        | 22           | 4,600        | 3,600       | 1.21      |
| 3     | MA                              | 200:1         | 5                                         | 10       | 31           | 6,300        | 5,000       | 1.15      |
| 4     | MA                              | 200:1         | 5                                         | 11       | 33           | 6,700        | 5,600       | 1.16      |
| 5     | MA                              | 200:1         | 5                                         | 12.5     | 37           | 7,500        | 6,500       | 1.12      |
| 6     | MA                              | 200:1         | 5                                         | 14       | 49           | 9,800        | 7,500       | 1.14      |
| 7     | MA                              | 200:1         | 5                                         | 16       | 51           | 10,000       | 9,100       | 1.10      |
